# Supplementary material for: Serum metabolomics uncovering specific metabolite signatures of intra- and extrahepatic cholangiocarcinoma
Source: Royal Society of Chemistry journal article supplement (doi:10.1039/c5mb00572h), 2015-11-13
Supplement: c5mb00572h2.pdf [file c5mb00572h2.pdf]

**Table S1.** Clinical characteristics of patients

| Characteristics           | Controls (n=85) | Training set/(n=176, ECC=90, ICC=86) | Validation set/(n=225, ECC=116, ICC=109) |
|---------------------------|-----------------|--------------------------------------|------------------------------------------|
| Sex (F/M)                 | 42/43           | 88/88                                | 112/113                                  |
| Age                       | 46±4            | 44±5                                 | 47±8                                     |
| BMI(kg/m <sup>2</sup> )   | 24.31±2.78      | 24.40±2.59                           | 23.99±3.37                               |
| HBsAg(negative/positive)  | negative        | positive                             | positive                                 |
| ALT (U/L)                 | 19.55±6.73      | 34.45±8.21                           | 36.28±7.67                               |
| AST (U/L)                 | 16.97±8.41      | 36.35±9.04                           | 32.37±10.17                              |
| ALP(U/L)                  | 64.25±22.13     | 94.76 ± 31.01                        | 98.15 ± 29.93                            |
| Bilirubin (total) (mg/dl) | 0.68±0.422      | 1.33±0.67                            | 1.63±0.74                                |
| Albumin (g/dl)            | 1.44±0.76       | 3.50±1.28                            | 3.80±1.21                                |
| Serum CEA (ng/ml)         | 3.08±1.11       | 5.27±2.24                            | 5.69±3.02                                |



**Table S3.** ROC curve analysis of serum metabolites detected by UPLC-MS

| No | Metabolite            | AUC   | Sensitivity (%) | Specificity (%) |
|----|-----------------------|-------|-----------------|-----------------|
| 1  | 21-Deoxycortisol      | 0.918 | 92.6            | 95.2            |
| 2  | Bilirubin             | 0.922 | 97.1            | 94.3            |
| 3  | LysoPC(14:0)          | 0.954 | 93.7            | 88.8            |
| 4  | LysoPC(15:0)          | 0.927 | 84.5            | 91.2            |
| 5  | four-metabolite panel | 0.993 | 98.5            | 99.2            |

**Table S4.** Kyoto Encyclopedia of Genes and Genomes (KEGG) pathway analysis in CC

| No. | Pathway Name                                          | Total | Expected | Hits | Raw p      | Impact  |
|-----|-------------------------------------------------------|-------|----------|------|------------|---------|
| 1   | Glycerophospholipid metabolism                        | 39    | 0.29165  | 4    | 0.00015313 | 0.28685 |
| 2   | Linoleic acid metabolism                              | 15    | 0.11217  | 2    | 0.005237   | 0       |
| 3   | Sphingolipid metabolism                               | 25    | 0.18695  | 2    | 0.014315   | 0.04292 |
| 4   | Glycosylphosphatidylinositol(GPI)-anchor biosynthesis | 14    | 0.10469  | 1    | 0.10001    | 0.0439  |
| 5   | Retinol metabolism                                    | 22    | 0.16452  | 1    | 0.15284    | 0.09322 |
| 6   | alpha-Linolenic acid metabolism                       | 29    | 0.21687  | 1    | 0.19665    | 0       |
| 7   | Methane metabolism                                    | 34    | 0.25426  | 1    | 0.22662    | 0       |
| 8   | Fatty acid metabolism                                 | 50    | 0.37391  | 1    | 0.31559    | 0       |
| 9   | Starch and sucrose metabolism                         | 50    | 0.37391  | 1    | 0.31559    | 0.01265 |
| 10  | Pentose and glucuronate interconversions              | 53    | 0.39634  | 1    | 0.33116    | 0.009   |
| 11  | Arachidonic acid metabolism                           | 62    | 0.46365  | 1    | 0.37588    | 0       |
| 12  | Steroid hormone biosynthesis                          | 99    | 0.74034  | 1    | 0.53174    | 0.01601 |
| 13  | Porphyrin and chlorophyll metabolism                  | 104   | 0.77773  | 1    | 0.54973    | 0.01101 |

Note: Total is the total number of compounds in the pathway; the Hits is the actually matched number from the user uploaded data; the Raw p is the original p value calculated from the enrichment analysis; the Impact is the pathway impact value calculated from pathway topology analysis.
